# Supplementary material for: Characteristics of unmanned aerial spraying systems and related spray drift: A review
Source: Frontiers journal article supplement (doi:10.3389/fpls.2022.870956), 2022-08-08
Supplement: Data_Sheet_1.PDF [file Data_Sheet_1.PDF]

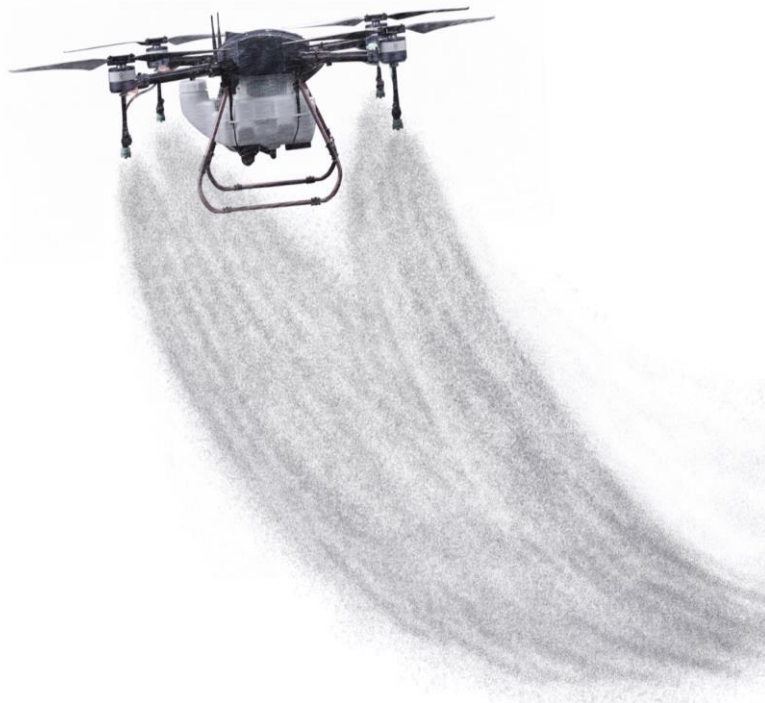

**Forward movement**

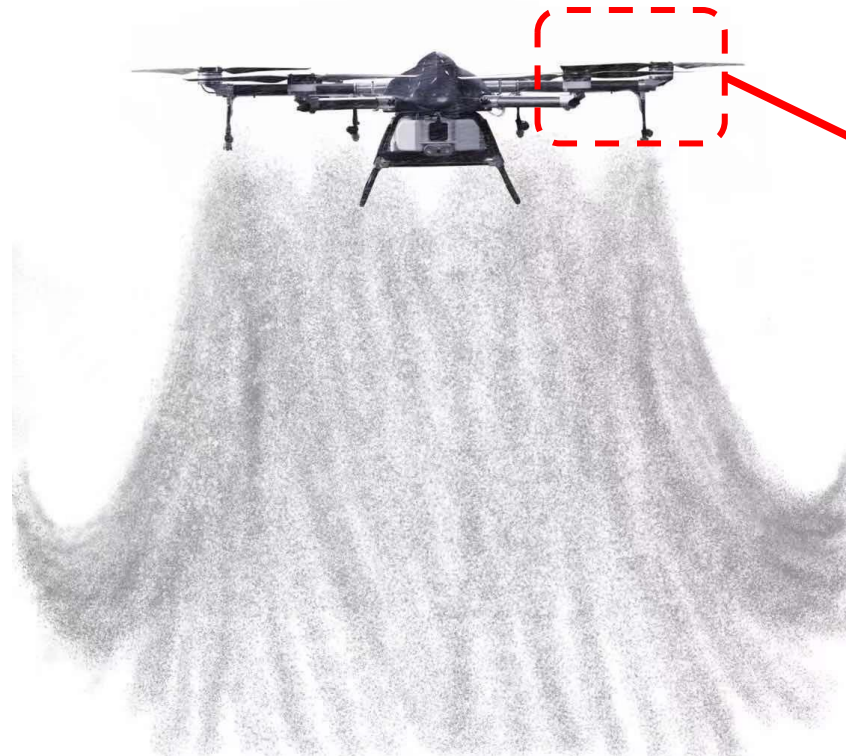

**Downwash airflow (hover state)**

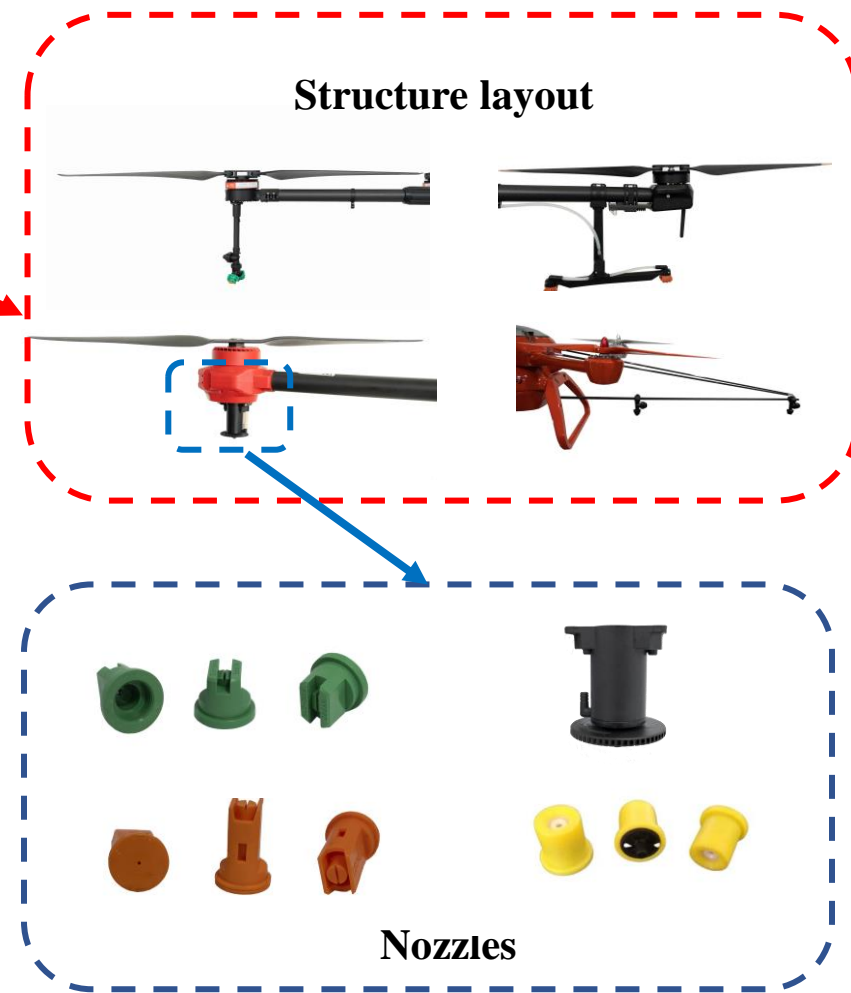

**Spray system and Structure layout**

The example UASS is Liberty Eagle TP-32, Source by Quanfeng Aviation, Anyang, China
